# Supplementary figures and images for: Test of the 'glymphatic' hypothesis demonstrates diffusive and aquaporin-4-independent solute transport in rodent brain parenchyma
Source: eLife journal article supplement (doi:10.7554/elife.27679), 2017-08-21

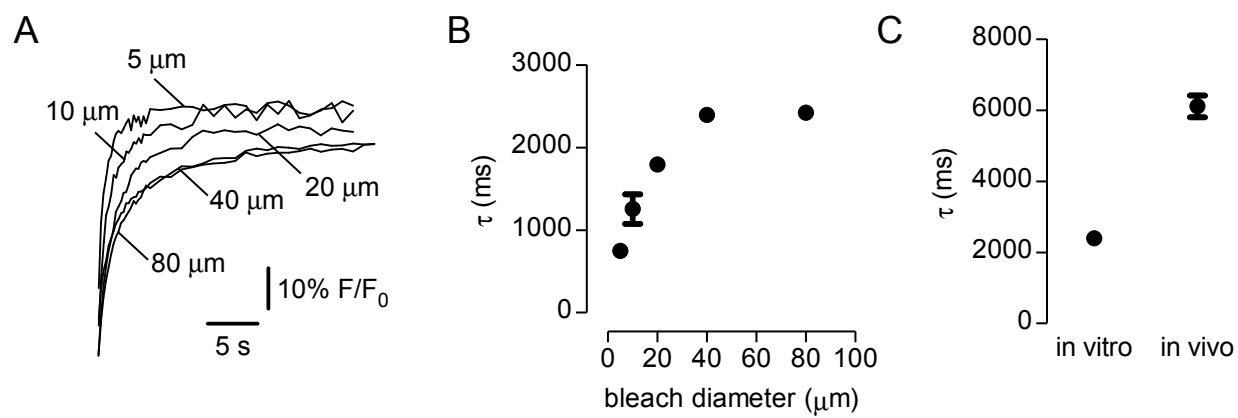

Figure 3 figure supplement 1

Supplement: supp [file elife-27679-supp-v1.zip]

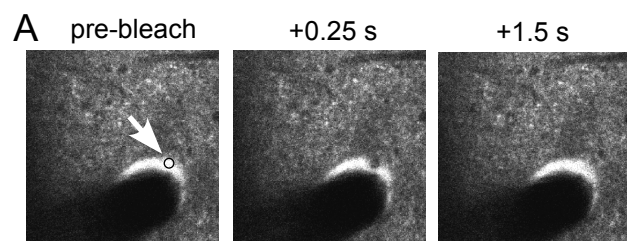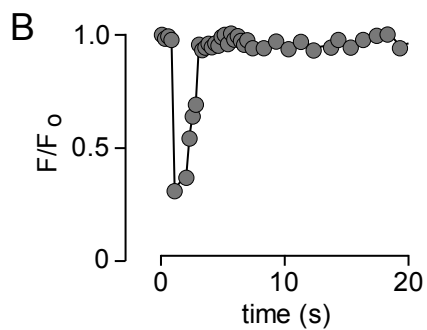

Figure 3 figure supplement 2

Supplement: supp [file elife-27679-supp-v1.zip]

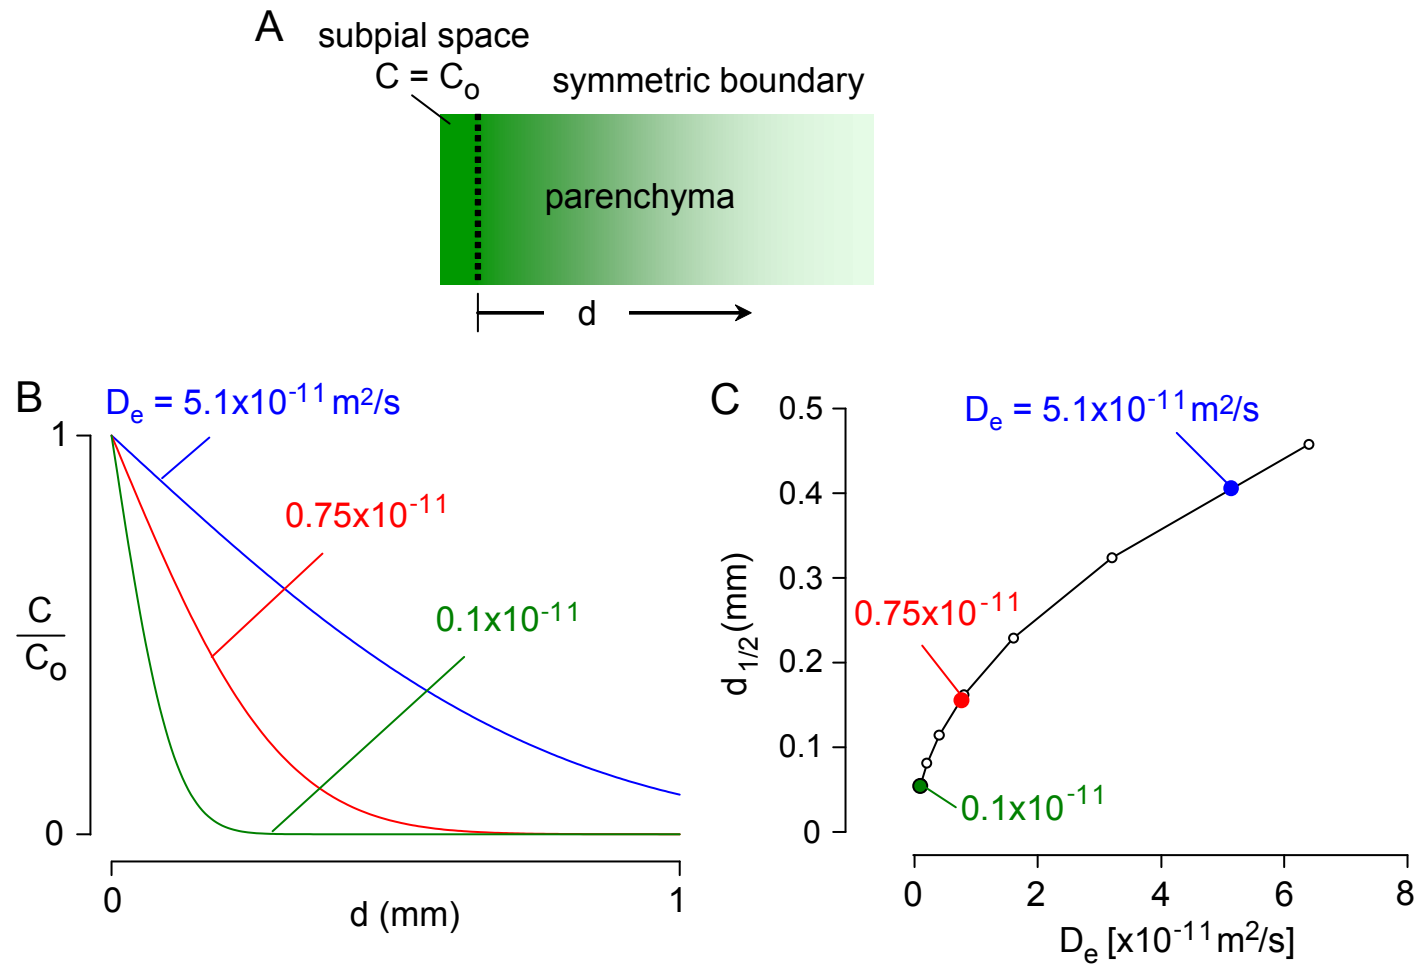

Figure 1 figure supplement 1

Supplement: supp [file elife-27679-supp-v1.zip]

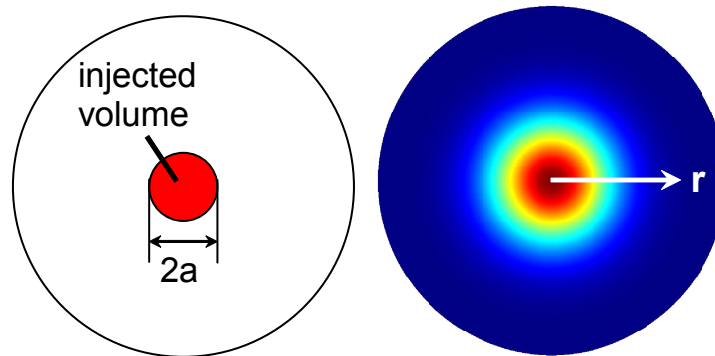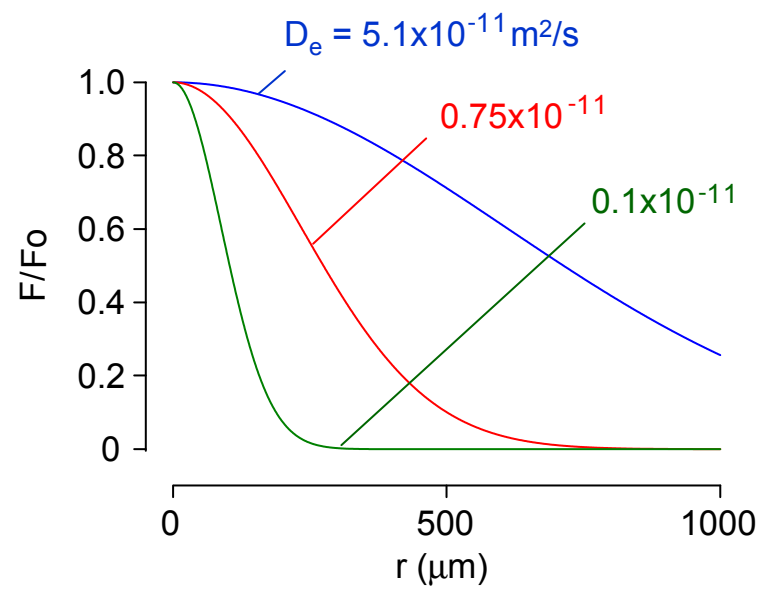

Figure 2 figure supplement 1

Supplement: supp [file elife-27679-supp-v1.zip]

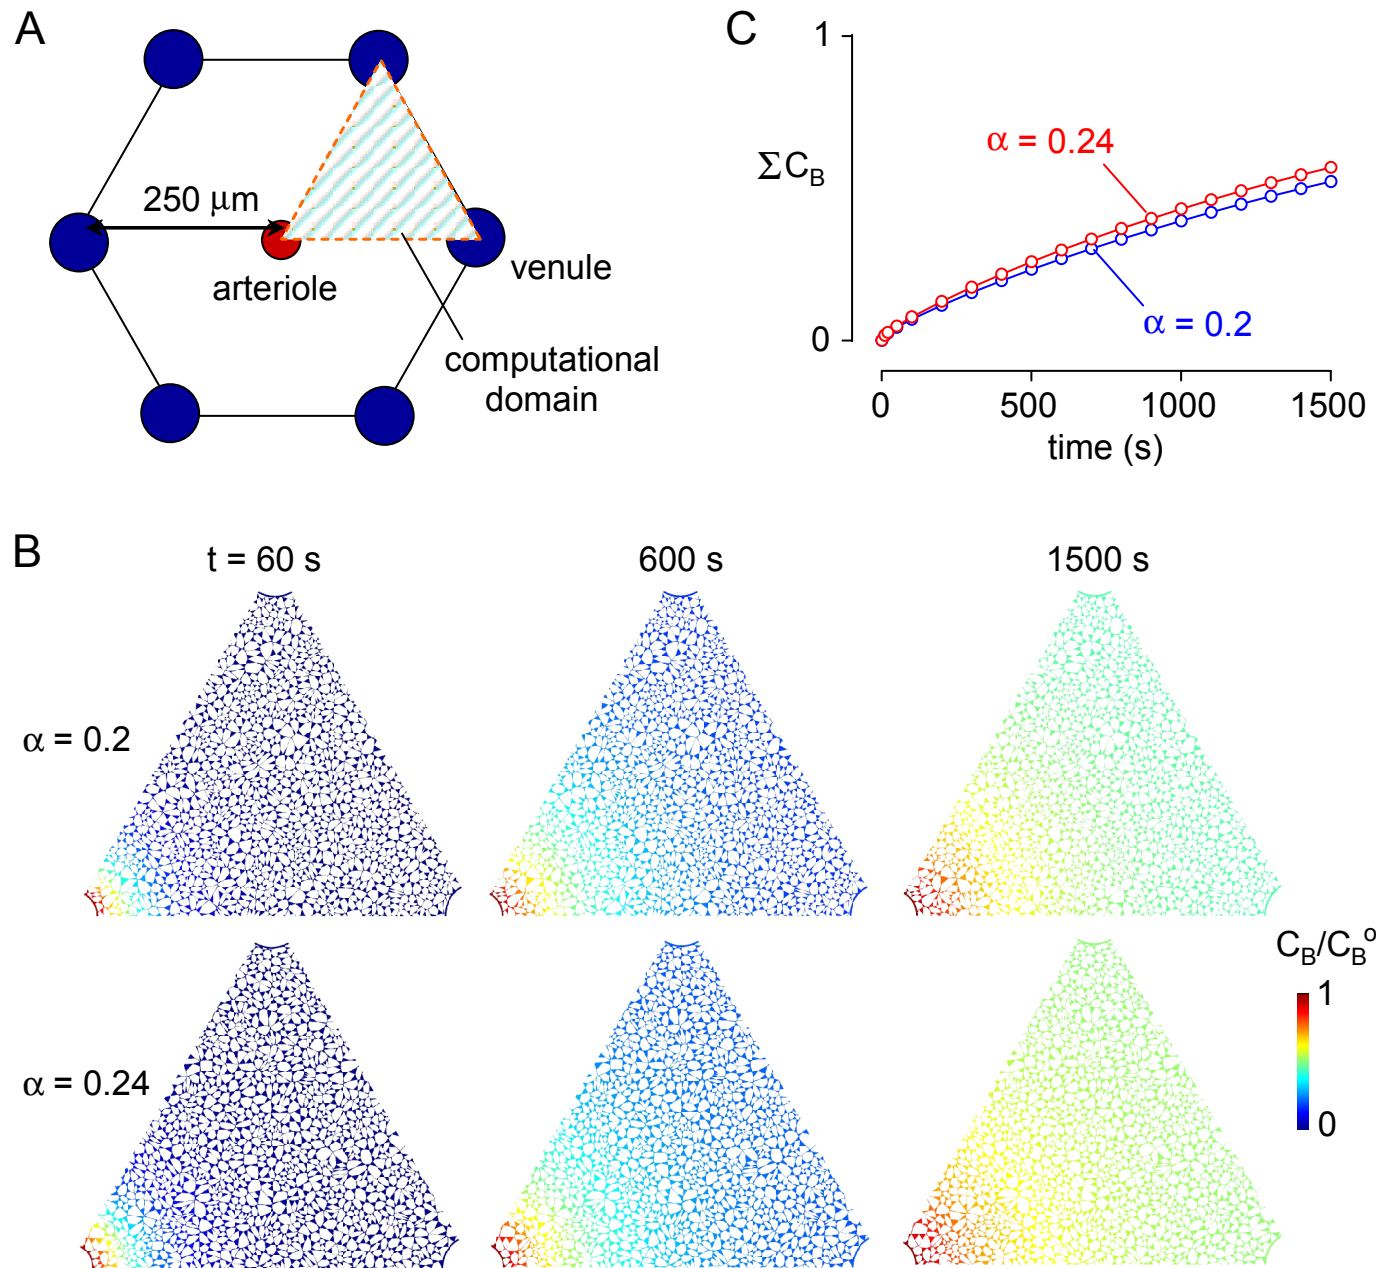

Figure 5 figure supplement 1

Supplement: supp [file elife-27679-supp-v1.zip]

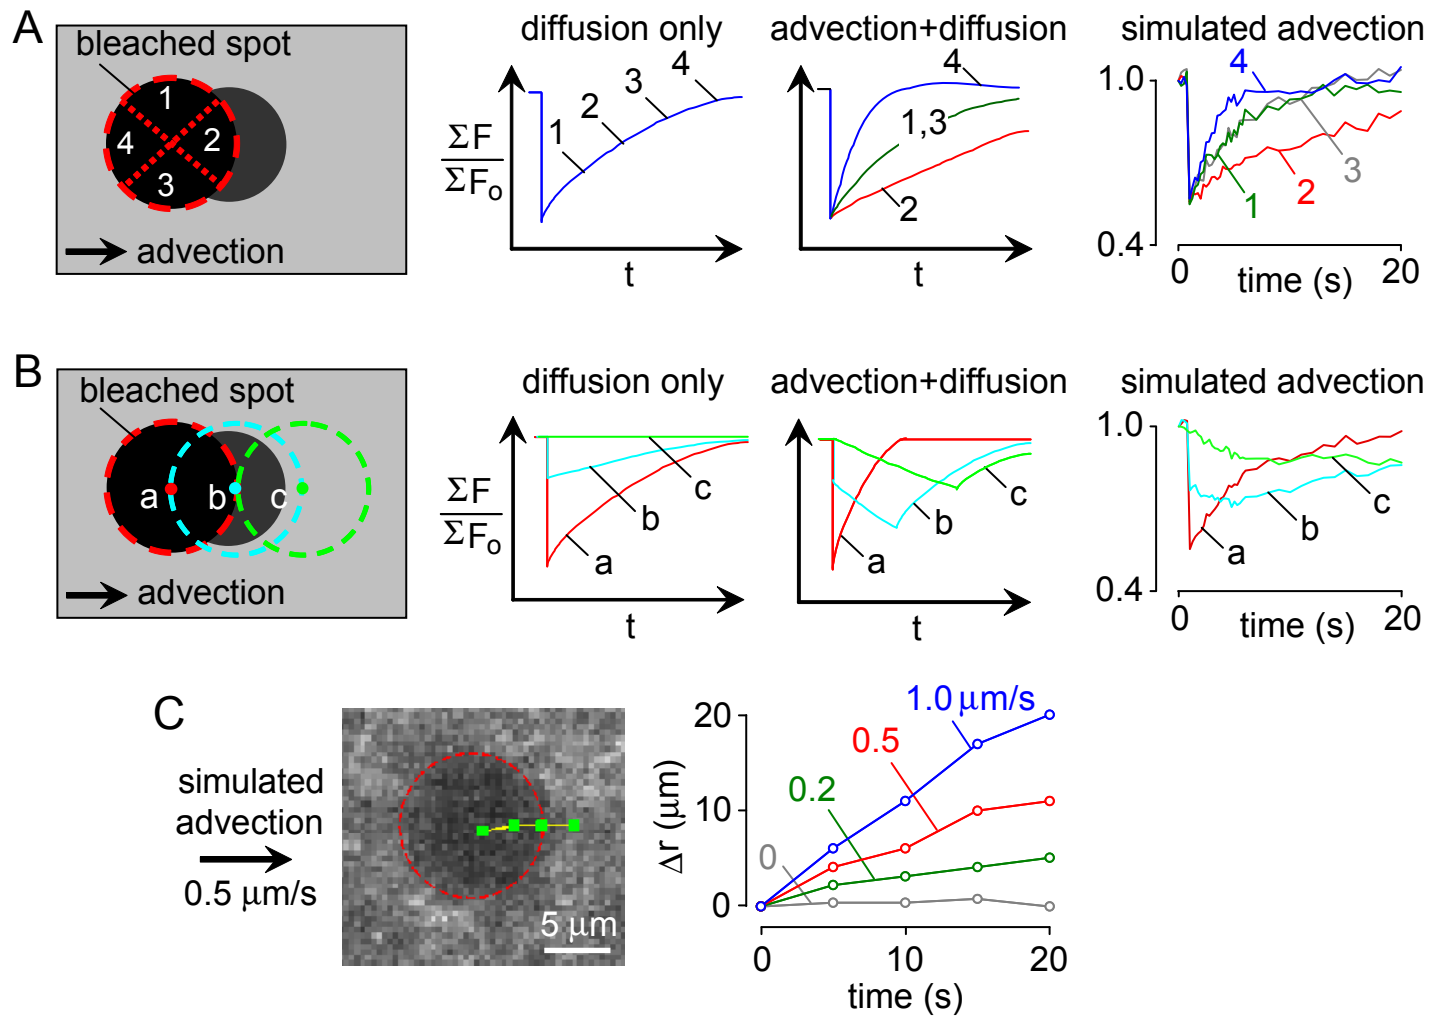

Figure 3 figure supplement 3

Supplement: supp [file elife-27679-supp-v1.zip]
